# Supplementary material for: Association between 8q24 rs6983267 polymorphism and cancer susceptibility: a meta-analysis involving 170,737 subjects
Source: PubMed Central journal article supplement (PMC5593654; doi:10.18632/oncotarget.18960), 2017-07-04
Supplement: oncotarget-08-57421-s001.pdf [file oncotarget-08-57421-s001.pdf]

## **Association between 8q24 rs6983267 polymorphism and cancer susceptibility: a meta-analysis involving 170,737 subjects**

### **SUPPLEMENTARY MATERIALS**

**Supplementary Table 1: Characteristics of the 78 studies included in this meta-analysis for the association between rs6983267 and cancer risk. See [Supplementary\\_Table\\_1](#)**

**Supplementary Table 2: False-positive report probability values for all significant associations between the rs6983267 polymorphism and cancer risk. See [Supplementary\\_Table\\_2](#)**

**Supplementary Table 3: The meta-regression results of the association between the rs6983267 polymorphism and cancer risk. See [Supplementary\\_Table\\_3](#)**

**Supplementary Table 4: The detailed search strategies of the association between the rs6983267 polymorphism and cancer risk**

| Database | Search strategy                                                                                                                                                                                                                                                                                                                                                                                                                                                           |                                                                                                                                                                                                                                                                            |
|----------|---------------------------------------------------------------------------------------------------------------------------------------------------------------------------------------------------------------------------------------------------------------------------------------------------------------------------------------------------------------------------------------------------------------------------------------------------------------------------|----------------------------------------------------------------------------------------------------------------------------------------------------------------------------------------------------------------------------------------------------------------------------|
| Pubmed   | <p>#1 Polymorphism, genetic<br/>           #2 Polymorphism*<br/>           #3 SNP<br/>           #4 Single nucleotide polymorphism<br/>           #5 Variant<br/>           #6 Mutation<br/>           #7 #1 OR #2 OR #3 OR #4 OR #5 OR #6<br/>           #8 rs6983267<br/>           #9 Neoplasms<br/>           #10 Cancer<br/>           #11 Carcino*<br/>           #12 #9 OR #10 OR #11<br/>           #13 #7 AND #8 AND #12</p>                                     | <p>((Polymorphism, genetic) OR<br/>           Polymorphism* OR SNP OR<br/>           (Single nucleotide polymorphism)<br/>           OR Variant OR Mutation) AND<br/>           rs6983267 AND (Neoplasms OR<br/>           Cancer OR Carcino*)</p>                         |
| Embase   | <p>#1 'neoplasm'/exp<br/>           #2 cancer<br/>           #3 tumor<br/>           #4 carcinoma<br/>           #5 carcinogenesis<br/>           #6 #1 OR #2 OR #3 OR #4 OR #5<br/>           #7 rs6983267<br/>           #8 'single nucleotide polymorphism'/exp<br/>           #9 SNP<br/>           #10 polymorphism<br/>           #11 variant<br/>           #12 mutation<br/>           #13 #8 OR #9 OR #10 OR #11 OR #12<br/>           #14 #6 AND #7 AND #13</p> | <p>('neoplasm'/exp OR cancer<br/>           OR tumor OR carcinoma OR<br/>           carcinogenesis) AND rs6983267<br/>           AND ('single nucleotide<br/>           polymorphism'/exp OR SNP OR<br/>           polymorphism OR variant OR<br/>           mutation)</p> |

**Supplementary Table 5: Score of quality assessment**

| Criteria                                          | Score |
|---------------------------------------------------|-------|
| <b>Ascertainment of cancer case</b>               |       |
| Histopathologic confirmation                      | 2     |
| by patient medical record                         | 1     |
| Not described                                     | 0     |
| <b>Representativeness of case</b>                 |       |
| Selected from population cancer registry          | 2     |
| Selected from hospital                            | 1     |
| No method of selection described                  | 0     |
| <b>Representativeness of control</b>              |       |
| Population-based                                  | 2     |
| Hospital-based                                    | 1     |
| Not described                                     | 0     |
| <b>Control selection</b>                          |       |
| Controls matched with cases by age and sex        | 2     |
| Controls matched with cases only by age or by sex | 1     |
| Not matched or not described                      | 0     |
| <b>Genotyping examination</b>                     |       |
| Genotyping done blindly and quality control       | 2     |
| Only genotyping done blindly or quality control   | 1     |
| Unblinded and without quality control             | 0     |
| <b>Total sample size</b>                          |       |
| > 400                                             | 2     |
| 200–400                                           | 1     |
| ≤ 200                                             | 0     |
